# Supplementary material for: Direct Imaging of Radiation Sensitive Organic Polymer-Based Nanocrystals at Sub-Ångström Resolution
Source: Preprints.org preprint supplement (doi:10.20944/preprints202404.1348.v1), 2024-04-22

## checkCIF/PLATON report

You have not supplied any structure factors. As a result the full set of tests cannot be run.

THIS REPORT IS FOR GUIDANCE ONLY. IF USED AS PART OF A REVIEW PROCEDURE FOR PUBLICATION, IT SHOULD NOT REPLACE THE EXPERTISE OF AN EXPERIENCED CRYSTALLOGRAPHIC REFEREE.

No syntax errors found.      CIF dictionary      Interpreting this report

### Datablock: X4ESxT-30Jul183541\_a\_tw6\_sx

---

|                        |                                         |                                         |                 |
|------------------------|-----------------------------------------|-----------------------------------------|-----------------|
| Bond precision:        | C-C = 0.0119 Å                          | Wavelength=0.70000                      |                 |
| Cell:                  | a=6.9300 (14)                           | b=9.3400 (19)                           | c=19.320 (4)    |
|                        | alpha=86.74 (3)                         | beta=82.59 (3)                          | gamma=86.90 (3) |
| Temperature:           | 100 K                                   |                                         |                 |
|                        | Calculated                              | Reported                                |                 |
| Volume                 | 1236.7 (4)                              | 1236.7 (4)                              |                 |
| Space group            | P -1                                    | P -1                                    |                 |
| Hall group             | -P 1                                    | -P 1                                    |                 |
| Moiety formula         | C8 H10 N4 O2, 2 (C7 H6 F N O2), C2 H4 O | C8 H10 N4 O2, 2 (C7 H6 F N O2), C2 H4 O |                 |
| Sum formula            | C24 H26 F2 N6 O7                        | C24 H26 F2 N6 O7                        |                 |
| Mr                     | 548.51                                  | 548.51                                  |                 |
| Dx, g cm <sup>-3</sup> | 1.473                                   | 1.473                                   |                 |
| Z                      | 2                                       | 2                                       |                 |
| Mu (mm <sup>-1</sup> ) | 0.114                                   | 0.114                                   |                 |
| F000                   | 572.0                                   | 572.0                                   |                 |
| F000'                  | 572.31                                  |                                         |                 |
| h, k, lmax             | 8, 11, 22                               | 8, 11, 22                               |                 |
| Nref                   | 4369                                    | 4196                                    |                 |
| Tmin, Tmax             | 0.993, 0.998                            |                                         |                 |
| Tmin'                  | 0.989                                   |                                         |                 |

Correction method= Not given

Data completeness= 0.960

Theta (max)= 24.624

R(reflections)= 0.1374 ( 2984)

wR2(reflections)=  
0.3911 ( 4196)

S = 1.075

Npar= 360

---

The following ALERTS were generated. Each ALERT has the format  
**test-name\_ALERT\_alert-type\_alert-level.**

Click on the hyperlinks for more details of the test.

---

**Alert level B**

PLAT084\_ALERT\_3\_B High wR2 Value (i.e. > 0.25) ..... 0.39 Report  
PLAT340\_ALERT\_3\_B Low Bond Precision on C-C Bonds ..... 0.01194 Ang.

---

**Alert level C**

PLAT029\_ALERT\_3\_C \_diffrn\_measured\_fraction\_theta\_full value Low . 0.960 Why?  
PLAT052\_ALERT\_1\_C Info on Absorption Correction Method Not Given Please Do !  
PLAT082\_ALERT\_2\_C High R1 Value ..... 0.14 Report

---

**Alert level G**

ABSMU01\_ALERT\_1\_G Calculation of \_exptl\_absorpt\_correction\_mu  
not performed for this radiation type.

PLAT002\_ALERT\_2\_G Number of Distance or Angle Restraints on AtSite 1 Note  
PLAT004\_ALERT\_5\_G Polymeric Structure Found with Maximum Dimension 1 Info  
PLAT007\_ALERT\_5\_G Number of Unrefined Donor-H Atoms ..... 6 Report  
PLAT083\_ALERT\_2\_G SHELXL Second Parameter in WGHT Unusually Large 5.66 Why ?  
PLAT092\_ALERT\_4\_G Check: Wavelength Given is not Cu,Ga,Mo,Ag,In Ka 0.70000 Ang.  
PLAT154\_ALERT\_1\_G The s.u.'s on the Cell Angles are Equal ..(Note) 0.03 Degree  
PLAT172\_ALERT\_4\_G The CIF-Embedded .res File Contains DFIX Records 1 Report  
PLAT180\_ALERT\_4\_G Check Cell Rounding: # of Values Ending with 0 = 4 Note  
PLAT300\_ALERT\_4\_G Atom Site Occupancy of H6A Constrained at 0.5 Check  
PLAT300\_ALERT\_4\_G Atom Site Occupancy of H6B Constrained at 0.5 Check  
PLAT300\_ALERT\_4\_G Atom Site Occupancy of H6C Constrained at 0.5 Check  
PLAT300\_ALERT\_4\_G Atom Site Occupancy of H6D Constrained at 0.5 Check  
PLAT300\_ALERT\_4\_G Atom Site Occupancy of H6E Constrained at 0.5 Check  
PLAT300\_ALERT\_4\_G Atom Site Occupancy of H6F Constrained at 0.5 Check  
PLAT300\_ALERT\_4\_G Atom Site Occupancy of H7A Constrained at 0.5 Check  
PLAT300\_ALERT\_4\_G Atom Site Occupancy of H7B Constrained at 0.5 Check  
PLAT300\_ALERT\_4\_G Atom Site Occupancy of H7C Constrained at 0.5 Check  
PLAT300\_ALERT\_4\_G Atom Site Occupancy of H7D Constrained at 0.5 Check  
PLAT300\_ALERT\_4\_G Atom Site Occupancy of H7E Constrained at 0.5 Check  
PLAT300\_ALERT\_4\_G Atom Site Occupancy of H7F Constrained at 0.5 Check  
PLAT300\_ALERT\_4\_G Atom Site Occupancy of H8A Constrained at 0.5 Check  
PLAT300\_ALERT\_4\_G Atom Site Occupancy of H8B Constrained at 0.5 Check  
PLAT300\_ALERT\_4\_G Atom Site Occupancy of H8C Constrained at 0.5 Check  
PLAT300\_ALERT\_4\_G Atom Site Occupancy of H8D Constrained at 0.5 Check  
PLAT300\_ALERT\_4\_G Atom Site Occupancy of H8E Constrained at 0.5 Check  
PLAT300\_ALERT\_4\_G Atom Site Occupancy of H8F Constrained at 0.5 Check  
PLAT860\_ALERT\_3\_G Number of Least-Squares Restraints ..... 1 Note  
PLAT870\_ALERT\_4\_G ALERTS Related to Twinning Effects Suppressed .. ! Info  
PLAT883\_ALERT\_1\_G No Info/Value for \_atom\_sites\_solution\_primary . Please Do !  
PLAT933\_ALERT\_2\_G Number of HKL-OMIT Records in Embedded .res File 56 Note  
PLAT941\_ALERT\_3\_G Average HKL Measurement Multiplicity ..... 1.0 Low  
PLAT965\_ALERT\_2\_G The SHELXL WEIGHT Optimisation has not Converged Please Check

---

0 **ALERT level A** = Most likely a serious problem - resolve or explain  
2 **ALERT level B** = A potentially serious problem, consider carefully

3 **ALERT level C** = Check. Ensure it is not caused by an omission or oversight  
33 **ALERT level G** = General information/check it is not something unexpected

4 ALERT type 1 CIF construction/syntax error, inconsistent or missing data  
5 ALERT type 2 Indicator that the structure model may be wrong or deficient  
5 ALERT type 3 Indicator that the structure quality may be low  
22 ALERT type 4 Improvement, methodology, query or suggestion  
2 ALERT type 5 Informative message, check

---

---

It is advisable to attempt to resolve as many as possible of the alerts in all categories. Often the minor alerts point to easily fixed oversights, errors and omissions in your CIF or refinement strategy, so attention to these fine details can be worthwhile. In order to resolve some of the more serious problems it may be necessary to carry out additional measurements or structure refinements. However, the purpose of your study may justify the reported deviations and the more serious of these should normally be commented upon in the discussion or experimental section of a paper or in the "special\_details" fields of the CIF. checkCIF was carefully designed to identify outliers and unusual parameters, but every test has its limitations and alerts that are not important in a particular case may appear. Conversely, the absence of alerts does not guarantee there are no aspects of the results needing attention. It is up to the individual to critically assess their own results and, if necessary, seek expert advice.

### **Publication of your CIF in IUCr journals**

A basic structural check has been run on your CIF. These basic checks will be run on all CIFs submitted for publication in IUCr journals (*Acta Crystallographica*, *Journal of Applied Crystallography*, *Journal of Synchrotron Radiation*); however, if you intend to submit to *Acta Crystallographica Section C* or *E* or *IUCrData*, you should make sure that full publication checks are run on the final version of your CIF prior to submission.

### **Publication of your CIF in other journals**

Please refer to the *Notes for Authors* of the relevant journal for any special instructions relating to CIF submission.

---

**PLATON version of 28/11/2022; check.def file version of 28/11/2022**

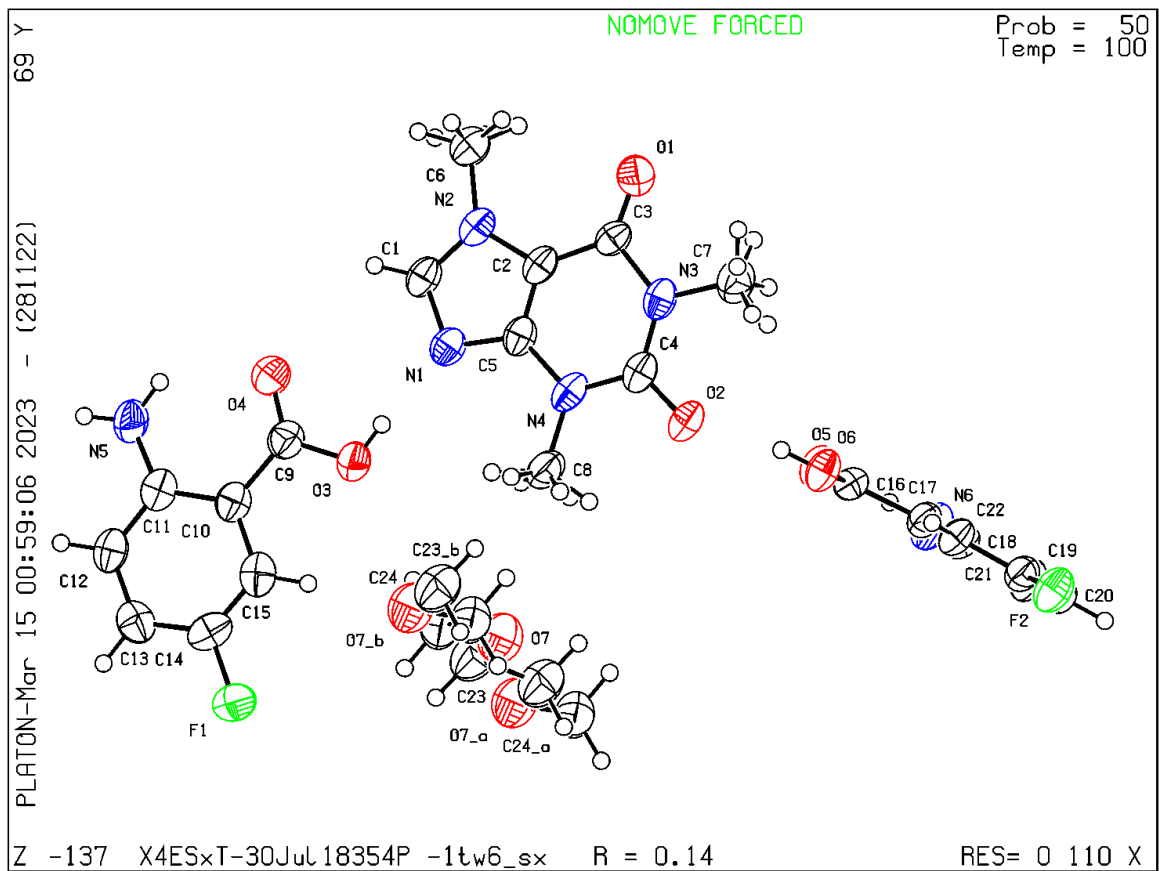

Supplement: Supplementary file 1 [file supplementary]
